# Supplementary material
Source: PubMed Central journal article supplement (PMC6151301)
Supplement: NIHMS949310-supplement-supplement_1.pdf [file NIHMS949310-supplement-supplement_1.pdf]

**Supplemental Material**

**Phthalate metabolite exposures among immigrants living in the United States: Findings from NHANES, 1999-2014**

Susanna D. Mitro, MyDzung T. Chu, Robin E. Dodson, Gary Adamkiewicz, Lucy Chie, Florence Brown, Tamarra M. James-Todd

**Table of Contents**

Table S1 ..... p 2

Table S2 ..... p 3

Table S3 ..... p 4

Table S4 ..... p 5

Table S5 ..... p 6

Code used to generate all analyses is available in its entirety beginning on p 7

**Table S1.** Demographic characteristics of foreign-born individuals by four-year sub-population.

|                                 | <b>1999-2002</b> | <b>2003-2006</b> | <b>2007-2010</b> | <b>2011-2014</b> |
|---------------------------------|------------------|------------------|------------------|------------------|
| % Foreign Born                  | 15.6%            | 15.7%            | 17.0%            | 18.1%            |
| Age                             |                  |                  |                  |                  |
| 20-29                           | 161 (19.0%)      | 153 (23.2%)      | 166 (20.7%)      | 146 (17.0%)      |
| 30-39                           | 161 (27.5%)      | 159 (24.9%)      | 172 (22.2%)      | 209 (25.3%)      |
| 40-49                           | 156 (21.1%)      | 127 (22.9%)      | 192 (23.3%)      | 221 (22.9%)      |
| 50-59                           | 83 (13.5%)       | 77 (15.7%)       | 166 (18.3%)      | 196 (15.4%)      |
| 60-69                           | 108 (10.0%)      | 64 (5.1%)        | 152 (7.8%)       | 202 (10.1%)      |
| 70-79                           | 70 (6.1%)        | 57 (5.9%)        | 77 (5.4%)        | 88 (6.3%)        |
| ≥ 80                            | 36 (2.8%)        | 30 (2.3%)        | 36 (2.3%)        | 46 (3.0%)        |
| Sex                             |                  |                  |                  |                  |
| Male                            | 377 (51.2%)      | 345 (52.6%)      | 497 (52.8%)      | 553 (48.1%)      |
| Female                          | 398 (48.8%)      | 322 (47.4%)      | 464 (47.2%)      | 555 (51.9%)      |
| Race/Ethnicity                  |                  |                  |                  |                  |
| Non-Hispanic White              | 95 (22.1%)       | 99 (28.6%)       | 86 (17.5%)       | 66 (14.7%)       |
| Non-Hispanic Black              | 62 (7.2%)        | 56 (6.0%)        | 65 (6.5%)        | 96 (6.4%)        |
| Mexican American                | 448 (28.1%)      | 371 (31.0%)      | 403 (29.8%)      | 253 (27.8%)      |
| Other Hispanic                  | 112 (27.5%)      | 70 (16.8%)       | 281 (19.8%)      | 251 (23.5%)      |
| Other                           | 58 (15.1%)       | 71 (17.6%)       | 126 (26.4%)      | 26 (2.7%)        |
| Non-Hispanic Asian <sup>1</sup> | --               | --               | --               | 416 (24.8%)      |
| Education                       |                  |                  |                  |                  |
| < High School                   | 455 (42.3%)      | 336 (33.7%)      | 466 (36.3%)      | 372 (34.0%)      |
| High School                     | 98 (17.1%)       | 114 (18.0%)      | 175 (18.5%)      | 195 (18.3%)      |
| Some College                    | 113 (19.3%)      | 115 (23.8%)      | 157 (18.3%)      | 241 (22.8%)      |
| ≥ College                       | 107 (21.2%)      | 102 (24.6%)      | 159 (26.9%)      | 298 (25.0%)      |
| Smoking                         |                  |                  |                  |                  |
| Current                         | 123 (19.0%)      | 111 (19.5%)      | 149 (15.3%)      | 114 (10.8%)      |
| Past                            | 156 (21.2%)      | 139 (21.0%)      | 181 (16.5%)      | 231 (19.7%)      |
| Never                           | 494 (59.8%)      | 414 (59.4%)      | 630 (68.3%)      | 762 (69.5%)      |
| Income/Poverty Ratio            |                  |                  |                  |                  |
| 0-0.99                          | 203 (23.7%)      | 195 (21.8%)      | 258 (23.6%)      | 258 (27.7%)      |
| 1-1.99                          | 234 (28.5%)      | 180 (24.8%)      | 278 (29.8%)      | 256 (25.0%)      |
| 2-3.99                          | 108 (20.7%)      | 84 (13.1%)       | 104 (13.6%)      | 143 (15.6%)      |
| 4-4.99                          | 79 (16.0%)       | 97 (24.4%)       | 94 (15.6%)       | 164 (17.0%)      |
| ≥5                              | 59 (11.1%)       | 60 (16.0%)       | 83 (17.4%)       | 151 (14.9%)      |
| Time in US                      |                  |                  |                  |                  |
| 0-4 years                       | 132 (19.5%)      | 115 (18.8%)      | 98 (12.0%)       | 115 (11.7%)      |
| 5-9 years                       | 110 (15.1%)      | 120 (17.2%)      | 149 (17.7%)      | 123 (13.4%)      |
| 10-19 years                     | 177 (23.8%)      | 148 (23.7%)      | 193 (24.5%)      | 314 (32.2%)      |
| 20-29 years                     | 152 (18.1%)      | 109 (18.4%)      | 210 (23.8%)      | 213 (19.8%)      |
| ≥ 30 years                      | 184 (23.5%)      | 164 (21.9%)      | 244 (22.0%)      | 301 (22.9%)      |

<sup>1</sup>Non-Hispanic Asians were not reported as a separate racial/ethnic group until 2011. Before 2011, they were recorded as part of the Other group.

**Table S2.** Demographic characteristics of foreign-born individuals, comparing those who had lived in the US less than 10 years versus those who had lived in the US at least 10 years.

| Characteristic        | <10 years   | ≥10 years    | P       |
|-----------------------|-------------|--------------|---------|
| Percent of immigrants | 30.9%       | 69.1%        |         |
| Age (years)           |             |              | <0.0001 |
| 20-29                 | 388 (39.6%) | 214 (11.1%)  |         |
| 30-39                 | 265 (33.3%) | 404 (21.0%)  |         |
| 40-49                 | 141 (14.4%) | 529 (26.3%)  |         |
| 50-59                 | 79 (7.8%)   | 423 (19.3%)  |         |
| 60-69                 | 54 (2.9%)   | 448 (10.8%)  |         |
| 70-79                 | 27 (1.7%)   | 257 (8.0%)   |         |
| ≥ 80                  | 8 (0.4%)    | 134 (3.6%)   |         |
| Sex                   |             |              | 0.30    |
| Male                  | 480 (52.7%) | 1218 (50.3%) |         |
| Female                | 482 (47.3%) | 1191 (49.7%) |         |
| Race/Ethnicity        |             |              | 0.056   |
| Non-Hispanic White    | 87 (17.7%)  | 250 (21.9%)  |         |
| Non-Hispanic Black    | 75 (7.1%)   | 198 (6.4%)   |         |
| Mexican American      | 439 (33.4%) | 968 (26.7%)  |         |
| Other Hispanic        | 158 (19.6%) | 506 (22.2%)  |         |
| Other                 | 203 (22.3%) | 487 (22.9%)  |         |
| Education             |             |              | 0.82    |
| < High School         | 435 (37.1%) | 1111 (35.3%) |         |
| High School           | 182 (18.4%) | 380 (17.9%)  |         |
| Some College          | 164 (20.9%) | 443 (21.3%)  |         |
| ≥ College             | 180 (23.7%) | 471 (25.5%)  |         |
| Smoking               |             |              | 0.01    |
| Current               | 148 (17.1%) | 322 (15.0%)  |         |
| Past                  | 145 (15.6%) | 538 (21.2%)  |         |
| Never                 | 665 (67.3%) | 1546 (63.9%) |         |
| Income/Poverty Ratio  |             |              | <0.0001 |
| 0-0.99                | 307 (30.8%) | 574 (20.7%)  |         |
| 1-1.99                | 294 (33.3%) | 628 (24.0%)  |         |
| 2-3.99                | 114 (14.6%) | 316 (16.2%)  |         |
| 4-4.99                | 85 (12.8%)  | 339 (20.9%)  |         |
| ≥5                    | 55 (8.6%)   | 292 (18.1%)  |         |

**Table S3.** Percent difference in phthalate metabolite levels by demographic characteristics of interest, within foreign-born individuals.

| <b>Characteristic</b> | <b>MEP</b>             | <b>MnBP</b>          | <b>MiBP</b>          | <b>MCPP</b>            | <b>MBzP</b>           | <b>ΣDEHP</b>         |
|-----------------------|------------------------|----------------------|----------------------|------------------------|-----------------------|----------------------|
|                       | %Difference (95% CI)   | %Difference (95% CI) | %Difference (95% CI) | %Difference (95% CI)   | %Difference (95% CI)  | %Difference (95% CI) |
| <b>Age</b>            |                        |                      |                      |                        |                       |                      |
| Continuous            | 1.7 (-1.0, 4.5)        | 0.30 (-1.2, 1.9)     | 1.4 (-0.4, 3.2)      | -2.0 (-3.7, -0.2)*     | -1.5 (-3.2, 0.3)      | -0.4 (-2.2, 1.5)     |
| Squared               | -0.02 (-0.04, -0.01)   | 0.01 (-0.01, 0.02)   | -0.01 (-0.03, 0.01)  | 0.02 (0.004, 0.04)*    | 0.01 (-0.01, 0.03)    | 0.01 (-0.01, 0.03)   |
| <b>Sex</b>            |                        |                      |                      |                        |                       |                      |
| Male                  | --                     | --                   | --                   | --                     | --                    | --                   |
| Female                | 33.5 (16.3, 53.2)**    | 52.0 (38.8, 66.5)**  | 28.4 (16.8, 41.2)**  | 19.4 (7.4, 32.9)**     | 24.1 (12.7, 36.5)**   | 19.0 (7.6, 31.5)**   |
| <b>Race/Ethnicity</b> |                        |                      |                      |                        |                       |                      |
| NH White              | --                     | --                   | --                   | --                     | --                    | --                   |
| NH Black              | 48.0 (8.8, 101.5)*     | 9.0 (-10.9, 33.4)    | 11.0 (-13.6, 42.5)   | -24.2 (-40.8, -2.9)*   | -16.3 (-35.5, 8.8)    | -19.6 (-37.9, 4.3)   |
| Mexican American      | 34.3 (0.8, 78.9)*      | 10.5 (-7.6, 32.1)    | 6.9 (-11.5, 29.0)    | -2.3 (-18.4, 17.1)     | 6.7 (-12.1, 29.5)     | 6.1 (-15.2, 32.7)    |
| Other Hispanic        | 44.8 (12.4, 86.6)**    | 26.0 (6.6, 48.8)**   | 14.3 (-5.5, 38.2)    | 9.1 (-10.5, 32.9)      | 0.1 (-19.1, 23.7)     | 2.6 (-19.0, 29.8)    |
| Other                 | -46.6 (-59.7, -29.2)** | 1.5 (-16.9, 23.9)    | -0.4 (-18.4, 21.6)   | -26.2 (-38.9, -10.7)** | -3.5 (-22.2, 19.8)    | -5.6 (-25.0, 18.8)   |
| <b>Education</b>      |                        |                      |                      |                        |                       |                      |
| < High School         | --                     | --                   | --                   | --                     | --                    | --                   |
| High School           | -2.6 (-16.8, 14.0)     | -1.4 (-14.1, 13.1)   | -2.5 (-13.4, 9.8)    | -4.9 (-16.9, 8.8)      | -0.3 (-14.4, 16.2)    | -9.7 (-22.3, 4.8)    |
| Some College          | 1.4 (-15.7, 22.0)      | -4.9 (-18.3, 10.7)   | -0.6 (-13.1, 13.7)   | -0.7 (-15.3, 16.4)     | 2.7 (-10.3, 17.6)     | 3.9 (-11.00, 21.3)   |
| ≥College              | -4.8 (-24.4, 19.9)     | -1.4 (-17.7, 18.2)   | -3.2 (-16.9, 12.9)   | 11.1 (-6.6, 32.2)      | -24.3 (-37.4, -8.5)** | -10.9 (-24.2, 4.6)   |
| <b>IPR</b>            |                        |                      |                      |                        |                       |                      |
| 0-0.99                | --                     | --                   | --                   | --                     | --                    | --                   |
| 1-1.99                | 5.0 (-12.5, 26.1)      | -2.9 (-14.1, 9.8)    | 7.3 (-4.7, 20.8)     | -2.9 (-14.1, 9.8)      | -9.1 (-19.8, 3.0)     | -2.8 (-13.6, 9.4)    |
| 2-2.99                | 4.8 (-17.3, 32.8)      | -10.7 (-23.6, 4.4)   | 2.8 (-14.2, 23.1)    | -0.6 (-17.2, 19.3)     | -6.3 (-18.7, 8.2)     | 24.9 (4.1, 49.8)*    |
| 3-4.99                | 12.2 (-9.6, 39.2)      | -4.9 (-18.8, 11.3)   | 4.4 (-11.8, 23.6)    | 7.0 (-10.0, 27.2)      | -0.4 (-15.3, 17.3)    | 15.4 (-5.9, 41.5)    |
| ≥5                    | -30.6 (-46.9, -9.3)**  | -15.5 (-31.4, 4.2)   | -7.8 (-24.0, 11.8)   | 14.4 (-7.9, 42.1)      | -18.2 (-33.9, 1.1)    | 20.4 (-1.9, 47.9)    |

Abbreviations: NH: Non-Hispanic; \*\*  $P < 0.01$ , \*  $P < 0.05$

**Table S4.** Percent difference in urinary phthalate metabolite levels by age group, nativity, and length of time in the United States, restricted to Mexican American participants only

|                              | <40 years old |                       | ≥40 years old |                       |
|------------------------------|---------------|-----------------------|---------------|-----------------------|
|                              | n             | % Difference (95% CI) | n             | % Difference (95% CI) |
| <b>MEP</b>                   |               |                       |               |                       |
| US-born                      | 331           | Ref1 <sup>1</sup>     | 532           | Ref2 <sup>2</sup>     |
| Recent immigrant (<10 yr)    | 293           | 31.9 (4.9, 65.9)*     | 101           | 29.8 (-7.7, 82.7)     |
| Long-term immigrant (≥10 yr) | 256           | 49.5 (19.4, 87.2)**   | 601           | 34.3 (6.8, 68.9)*     |
| <b>MnBP</b>                  |               |                       |               |                       |
| US-born                      | 330           | Ref1                  | 533           | Ref2                  |
| Recent immigrant (<10 yr)    | 292           | 12.4 (-5.2, 33.4)     | 101           | 11.3 (-14.3, 44.7)    |
| Long-term immigrant (≥10 yr) | 255           | 14.0 (-2.0, 32.8)     | 600           | -1.7 (-13.6, 11.9)    |
| <b>MiBP</b>                  |               |                       |               |                       |
| US-born                      | 286           | Ref1                  | 445           | Ref2                  |
| Recent immigrant (<10 yr)    | 254           | 21.7 (1.8, 45.4)*     | 85            | 25.4 (-3.5, 63.0)     |
| Long-term immigrant (≥10 yr) | 217           | 18.3 (2.8, 36.1)*     | 493           | 2.8 (-8.7, 15.8)      |
| <b>MCPP</b>                  |               |                       |               |                       |
| US-born                      | 285           | Ref1                  | 445           | Ref2                  |
| Recent immigrant (<10 yr)    | 253           | -3.6 (-18.2, 13.6)    | 85            | -3.4 (-26.0, 26.1)    |
| Long-term immigrant (≥10 yr) | 216           | -10.1 (-26.4, 9.8)    | 492           | -3.4 (-17.7, 13.5)    |
| <b>MBzP</b>                  |               |                       |               |                       |
| US-born                      | 331           | Ref1                  | 533           | Ref2                  |
| Recent immigrant (<10 yr)    | 293           | -11.6 (-26.3, 6.0)    | 101           | -29.2 (-46.6, -6.0)*  |
| Long-term immigrant (≥10 yr) | 256           | -4.1 (-20.3, 15.5)    | 601           | -22.4 (-33.5, -9.4)** |
| <b>ΣDEHP</b>                 |               |                       |               |                       |
| US-born                      | 286           | Ref1                  | 445           | Ref2                  |
| Recent immigrant (<10 yr)    | 254           | 7.8 (-10.9, 30.4)     | 85            | 4.3 (-22.5, 40.5)     |
| Long-term immigrant (≥10 yr) | 217           | 5.3 (-13.0, 27.5)     | 493           | 2.5 (-14.3, 22.7)     |

\*  $P < 0.05$ ; \*\*  $P < 0.01$ ; <sup>1</sup>Ref1: US-born individuals under age 40; <sup>2</sup>Ref2: US-born individuals

aged 40 and older

**Table S5.** Percent difference in urinary phthalate metabolite levels by age group, nativity, and length of time in the United States, restricted to years 2011-2014 only.

|                              | <40 years old |                        | ≥40 years old |                       |
|------------------------------|---------------|------------------------|---------------|-----------------------|
|                              | n             | % Difference (95% CI)  | n             | % Difference (95% CI) |
| <b>MEP</b>                   |               |                        |               |                       |
| US-born                      | 817           | Ref1 <sup>1</sup>      | 1424          | Ref2 <sup>2</sup>     |
| Recent immigrant (<10 yr)    | 130           | 64.3 (15.1, 134.5)**   | 80            | 37.9 (-10.4, 112.4)   |
| Long-term immigrant (≥10 yr) | 177           | 32.0 (0.1, 74.1)*      | 545           | 45.0 (11.9, 87.7)**   |
| <b>MnBP</b>                  |               |                        |               |                       |
| US-born                      | 817           | Ref1                   | 1422          | Ref2                  |
| Recent immigrant (<10 yr)    | 130           | 12.1 (-14.3, 46.6)     | 79            | 23.5 (-7.5, 64.8)     |
| Long-term immigrant (≥10 yr) | 177           | 9.3 (-7.0, 28.4)       | 545           | 27.4 (8.8, 49.1)**    |
| <b>MiBP</b>                  |               |                        |               |                       |
| US-born                      | 817           | Ref1                   | 1424          | Ref2                  |
| Recent immigrant (<10 yr)    | 130           | 11.4 (-14.4, 45.1)     | 80            | 76.8 (42.6, 119.2)**  |
| Long-term immigrant (≥10 yr) | 177           | 11.0 (-5.9, 31.0)      | 545           | 32.3 (15.8, 51.2)**   |
| <b>MCPP</b>                  |               |                        |               |                       |
| US-born                      | 817           | Ref1                   | 1422          | Ref2                  |
| Recent immigrant (<10 yr)    | 130           | -29.9 (-44.9, -10.9)** | 79            | -29.0 (-49.9, 0.7)    |
| Long-term immigrant (≥10 yr) | 177           | -10.2 (-30.6, 16.4)    | 545           | 10.5 (-11.6, 38.1)    |
| <b>MBzP</b>                  |               |                        |               |                       |
| US-born                      | 817           | Ref1                   | 1424          | Ref2                  |
| Recent immigrant (<10 yr)    | 130           | -20.2 (-41.2, 8.2)     | 80            | -22.7 (-43.8, 6.4)    |
| Long-term immigrant (≥10 yr) | 177           | -7.1 (-27.4, 18.8)     | 545           | -11.8 (-26.7, 6.3)    |
| <b>∑DEHP</b>                 |               |                        |               |                       |
| US-born                      | 817           | Ref1                   | 1424          | Ref2                  |
| Recent immigrant (<10 yr)    | 130           | -7.8 (-25.7, 14.4)     | 80            | 24.1 (1.5, 51.7)*     |
| Long-term immigrant (≥10 yr) | 177           | 9.4 (-5.7, 26.9)       | 545           | 20.3 (5.7, 36.9)**    |

\*  $P < 0.05$ ; \*\*  $P < 0.01$ ; <sup>1</sup>Ref1: US-born individuals under age 40; <sup>2</sup>Ref2: US-born individuals

aged 40 and older

## Analysis Code

**\*\*making weights: 2001-2014**

\*\*\*\*\*;

data all\_data; set all\_data;

if sddsrvyr =2 then wtsb14yr = wtsph2yr\*(1/7); /\*for 2001-2002\*/

else if sddsrvyr in(3,4,5,6,8) then wtsb14yr = wtsb2yr\*(1/7); /\*for 2003-10, 2013-14\*/

else if sddsrvyr =7 then wtsb14yr = wtsa2yr\*(1/7); /\*for 2011-2012\*/

else wtsb14yr = .;

run;

**\*\*making weights: 1999-2014**

\*\*\*\*\*;

data all\_data; set all\_data;

if sddsrvyr in (1,2) then wtsb16yr = wtsph4yr\*(2/8); /\*for 2001-2002\*/

else if sddsrvyr in(3,4,5,6,8) then wtsb16yr = wtsb2yr\*(1/8); /\*for 2003-10, 2013-14\*/

else if sddsrvyr =7 then wtsb16yr = wtsa2yr\*(1/8); /\*for 2011-2012\*/

else wtsb16yr = -10;

run;

**\*\*making weights for each 4-year period**

1999-2002 = wtsph4yr (no new variable needed)

\*\*\*\*\*;

\*2003-2006;

data all\_data; set all\_data;

if sddsrvyr in(3,4) then wtsb0306 = wtsb2yr\*(1/2);

run;

\*2007-2010;

data all\_data; set all\_data;

if sddsrvyr in(5,6) then wtsb0710 = wtsb2yr\*(1/2);

run;

\*2011-2014;

data all\_data; set all\_data;

if sddsrvyr = 7 then wtsb1114 = wtsa2yr\*(1/2);

if sddsrvyr = 8 then wtsb1114 = wtsb2yr\*(1/2);

run;

**\*making a consistent immigration status variable: yes/no**

\*\*\*\*\*;

data all\_data; set all\_data;

if dmdborn = . and SDDSRVYR in (1,2,3,4) then immigrant=.;

else if dmdborn = 1 and SDDSRVYR in (1,2,3,4) then immigrant=0; /\*Born in US\*/

else if dmdborn in (1,2,3) and SDDSRVYR in (1,2,3,4) then immigrant=1; /\*Immigrant\*/

```

else if dmdborn2 = . and SDDSRVYR in (5,6) then immigrant=.;
else if dmdborn2 = 1 and SDDSRVYR in (5,6) then immigrant=0; /*Born in US*/
else if dmdborn2 in (2,4,5) and SDDSRVYR in (5,6) then immigrant=1; /*Immigrant*/

```

```

else if dmdborn4 = . and SDDSRVYR in (7,8) then immigrant=.;
else if dmdborn4 = 1 and SDDSRVYR in (7,8) then immigrant=0; /*Born in US*/
else if dmdborn4 = 2 and SDDSRVYR in (7,8) then immigrant=1; /*Immigrant*/

```

```

else if dmdborn = 7 or dmdborn = 9 or dmdborn2 = 7 or dmdborn4 in (77,99) then immigrant = .;
else immigrant = 3;
run;

```

```

*making studypop=1

```

```

*****.

```

```

data all_data; set all_data;
if ridageyr < 20 then delete;
run;

```

```

data all_data; set all_data;
if immigrant = . or wtsb16yr = . or ridageyr <20 then studypop=0;
else studypop=1;
run;
proc freq data=all_data;
tables studypop;
run;

```

```

*years in US

```

```

*****.

```

```

data all_data; set all_data;
if dmdyrsus in (77,88,99) then dmdyrsus = .;
run;

```

```

data all_data; set all_data;
if dmdyrsus = . then usyears_cat = .;
else if dmdyrsus in (1,2,3) then usyears_cat = 1; /* 0 - less than 10 yrs */
else if dmdyrsus in (4,5) then usyears_cat = 2; /* 10- less than 20 years */
else if dmdyrsus = 6 then usyears_cat = 3; /*20- less than 30 years */
else if dmdyrsus = 7 then usyears_cat = 4; /*30- less than 40 years */
else if dmdyrsus in (8,9) then usyears_cat = 5; /* 40 or more years */
else usyears_cat = 6;
run;

```

```

*age

```

```

*****.

```



```

data all_data; set all_data;
if ridageyr = . then age_cat = .;
else if ridageyr <20 then age_cat = 0;
else if ridageyr >=20 and ridageyr <30 then age_cat=1;
else if ridageyr >=30 and ridageyr <40 then age_cat=2;
else if ridageyr >=40 and ridageyr <50 then age_cat=3;
else if ridageyr >=50 and ridageyr <60 then age_cat=4;
else if ridageyr >=60 and ridageyr <70 then age_cat=5;
else if ridageyr >=70 and ridageyr <80 then age_cat=6;
else if ridageyr >=80 then age_cat = 7;
else age_cat = 99;
run;

```

#### \*education

```

*****.
data all_data; set all_data;
if ridageyr <20 then edu_cat = 0;
else if dmddeduc2 in (.,7,9) then edu_cat = .;
else if dmddeduc2 in (1,2) then edu_cat =1;
else if dmddeduc2 = 3 then edu_cat = 2;
else if dmddeduc2 = 4 then edu_cat = 3;
else if dmddeduc2 = 5 then edu_cat = 4;
else edu_cat = 99;
run;

```

#### \*PIR

```

*****.
data all_data; set all_data;
if indfmpir = . then PIR_cat = .;
else if indfmpir < 1 then pir_cat = 1;
else if indfmpir >=1 then pir_cat = 2;
else pir_cat = 99;
run;

```

#### \*BMI

```

*****.
data all_data; set all_data;
if bmx bmi = . then bmi_cat = .;
else if bmx bmi <25 then bmi_cat = 1;
else if bmx bmi >=25 and bmx bmi <30 then bmi_cat = 2;
else if bmx bmi >=30 then bmi_cat = 3;
else bmi_cat = 99;
run;

```

## \*SMOKING

```
*****;
```

```
data all_data; set all_data;
if smq020 in (.,7,9) then smoke_cat = .;
else if smq020 = 1 and smq040 in (1,2) then smoke_cat = 1;
else if smq020 = 1 and smq040 =3 then smoke_cat =2;
else if smq020 = 2 then smoke_cat = 3;
else smoke_cat = 99;
```

```
run;
data all_data; set all_data;
if smoke_cat = . then current_smoker = .;
else if smoke_cat = 1 then current_smoker = 1;
else if smoke_cat in (2,3) then current_smoker =0;
else current_smoker = 99;
run;
```

```
/*sumDEHP*/
```

```
data all_data; set all_data;
sumDEHP = ((urxmhp*(1/278.34348)) + (urxmhh*(1/294.34280)) + (urxmoh*(1/292.3286)));
run;
```

```
***** PERCENT USING AN INTERPRETER OR SPANISH;
```

```
proc surveyfreq data=all_data;
cluster sdmvpsu;
strata sdmvstra;
weight wtsb16yr;
tables sddsrivr*(sialang siaintrp)/row;
where studypop=1;
run;
```

```
*****
```

```
TABLE 1: DEMOGRAPHICS in over 20's
```

```
*****;
```

```
*numbers;
PROC SURVEYFREQ DATA= all_data;
TABLES studypop*(age_cat riagendr ridreth1 edu_cat
smoke_cat pir_5cat)*immigrant;
RUN;
```

```
*weighted percents;
PROC SURVEYFREQ DATA= all_data;
cluster sdmvpsu;
strata sdmvstra;
weight wtsb16yr;
```

```
TABLES studypop*(age_cat riagendr ridreth1 edu_cat
          smoke_cat pir_5cat)*immigrant/chisq col;
RUN;
```

```
*numbers: years in US;
PROC SURVEYFREQ DATA= all_data;
TABLES immigrant*studypop*year_trends;
RUN;
```

```
*weighted percents;
PROC SURVEYFREQ DATA= all_data;
cluster sdmvpsu;
strata sdmvstra;
weight wtsb16yr;
TABLES immigrant*studypop*year_trends/chisq row;
RUN;
```

```
***** SENSITIVITY ANALYSIS BY SURVEY YEAR: TABLE S1 *****;
```

```
****by survey year;
```

```
*1999-2002
```

```
*****;
```

```
*numbers;
PROC SURVEYFREQ DATA= all_data;
TABLES studypop*(age_cat riagendr ridreth1 edu_cat
          smoke_cat pir_5cat)*immigrant;
where sddsrivr in (1,2);
RUN;
```

```
*weighted percents;
PROC SURVEYFREQ DATA= all_data;
cluster sdmvpsu;
strata sdmvstra;
weight wtsph4yr;
TABLES studypop*(age_cat riagendr ridreth1 edu_cat
          smoke_cat pir_5cat)*immigrant/chisq col;
where sddsrivr in (1,2);
RUN;
```

```
*percent immigrants in the study population;
PROC SURVEYFREQ DATA= all_data;
cluster sdmvpsu;
strata sdmvstra;
weight wtsph4yr;
TABLES studypop*immigrant/row;
where sddsrivr in (1,2);
RUN;
```

```

*years: numbers;
PROC SURVEYFREQ DATA= all_data;
TABLES immigrant*studypop*year_trends;
where sddsrvyr in (1,2);
RUN;
*years: weighted percent;
PROC SURVEYFREQ DATA= all_data;
cluster sdmvpsu;
strata sdmvstra;
weight wtsph4yr;
TABLES immigrant*studypop*year_trends/chisq row;
where sddsrvyr in (1,2);
RUN;

*2003-2006;
*****;
*numbers;
PROC SURVEYFREQ DATA= all_data;
TABLES studypop*(age_cat riagendr ridreth1 edu_cat
                smoke_cat pir_5cat)*immigrant;
where sddsrvyr in (3,4);
RUN;

*weighted percents;
PROC SURVEYFREQ DATA= all_data;
cluster sdmvpsu;
strata sdmvstra;
weight wtsb0306;
TABLES studypop*(age_cat riagendr ridreth1 edu_cat
                smoke_cat pir_5cat)*immigrant/col;
where sddsrvyr in (3,4);
RUN;
*percent of immigrants in the population (weighted);
PROC SURVEYFREQ DATA= all_data;
cluster sdmvpsu;
strata sdmvstra;
weight wtsb0306;
TABLES studypop*immigrant/row;
where sddsrvyr in (3,4);
RUN;

*numbers;
PROC SURVEYFREQ DATA= all_data;
TABLES studypop*(year_trends)*immigrant;

```

```
where sddsrstyr in (3,4);
RUN;
```

```
*weighted percents;
PROC SURVEYFREQ DATA= all_data;
cluster sdmvpsu;
strata sdmvstra;
weight wtsb0306;
TABLES immigrant*studypop*year_trends/chisq row;
where sddsrstyr in (3,4);
RUN;
```

```
*2007-2010;
*****;
*numbers;
PROC SURVEYFREQ DATA= all_data;
TABLES studypop*(age_cat riagendr ridreth1 edu_cat
                smoke_cat pir_5cat)*immigrant;
where sddsrstyr in (5,6);
RUN;
```

```
*weighted percents;
PROC SURVEYFREQ DATA= all_data;
cluster sdmvpsu;
strata sdmvstra;
weight wtsb0710;
TABLES studypop*(age_cat riagendr ridreth1 edu_cat
                smoke_cat pir_5cat)*immigrant/col;
where sddsrstyr in (5,6);
RUN;
```

```
*percent of immigrants in the population (weighted);
PROC SURVEYFREQ DATA= all_data;
cluster sdmvpsu;
strata sdmvstra;
weight wtsb0710;
TABLES studypop*immigrant/row;
where sddsrstyr in (5,6);
RUN;
```

```
*YEAR TRENDS: comparing non-immigrants to immigrants;
data all_data; set all_data;
if immigrant = . then year_trends = .;
else if immigrant = 1 and dmdyrsus = . then year_trends = .;
else if immigrant = 0 then year_trends = 0; /* US born*/
else if immigrant = 1 and dmdyrsus in (1,2) then year_trends = 1; /*0-5 yrs*/
else if immigrant = 1 and dmdyrsus = 3 then year_trends = 2; /*5-9 yrs*/
else if immigrant = 1 and dmdyrsus in (4,5) then year_trends = 3; /*10-19 yrs*/
```

```

else if immigrant = 1 and dmdyrsus =6 then year_trends = 4; /*20-29 yrs*/
else if immigrant = 1 and dmdyrsus in (7,8,9) then year_trends = 5; /*30+ yrs*/
else year_trends = 6;
run;

```

```

*numbers by years in US;
PROC SURVEYFREQ DATA= all_data;
TABLES immigrant*studypop*year_trends;
where sddsrvyr in (5,6);
RUN;
*weighted percents by years in US;
PROC SURVEYFREQ DATA= all_data;
cluster sdmvpsu;
strata sdmvstra;
weight wtsb0710;
TABLES immigrant*studypop*year_trends/chisq row;
where sddsrvyr in (5,6);
RUN;

```

```

*2011-2014;
*****;
*numbers;
PROC SURVEYFREQ DATA= all_data;
TABLES studypop*(age_cat riagendr ridreth3 edu_cat
                smoke_cat pir_5cat)*immigrant;
where sddsrvyr in (7,8);
RUN;
PROC SURVEYFREQ DATA= all_data;
cluster sdmvpsu;
strata sdmvstra;
weight wtsb1114;
TABLES studypop*(age_cat riagendr ridreth3 edu_cat
                smoke_cat pir_5cat)*immigrant/col;
where sddsrvyr in (7,8);
RUN;

```

```

*weighted percent of immigrants in the study population;
PROC SURVEYFREQ DATA= all_data;
cluster sdmvpsu;
strata sdmvstra;
weight wtsb1114;
TABLES studypop*immigrant/row;
where sddsrvyr in (7,8);
RUN;

```

```

*numbers for years in US;
PROC SURVEYFREQ DATA= all_data;
TABLES immigrant*studypop*year_trends;
where sddsrvyr in (7,8);
RUN;
*weighted percents for years in US;
PROC SURVEYFREQ DATA= all_data;
cluster sdmvpsu;
strata sdmvstra;
weight wtsb1114;
TABLES immigrant*studypop*year_trends/chisq row;
where sddsrvyr in (7,8);
RUN;

```

```

*****

```

SENSITIVITY ANALYSIS BY YEARS IN US:  
SUPPLEMENTAL TABLE S2

```

*****

```

```

****in the us less than 10 yrs versus others: immigrants;
data all_data; set all_data;
if dmdyrsus = . then usyears_10 = .;
else if dmdyrsus in (1,2,3) then usyears_10 = 1; /* 0 - less than 10 yrs */
else if dmdyrsus in (4,5,6,7,8,9) then usyears_10 = 2; /* 10- less than 20 years */
else usyears_10 = 6;
run;
proc freq data=all_data;
tables usyears_10;
run;
*sample size;
PROC SURVEYFREQ DATA= all_data;
TABLES studypop*(age_cat riagendr ridreth1 edu_cat
                smoke_cat pir_5cat)*usyears_10/chisq col;
RUN;
*weighted percents;
PROC SURVEYFREQ DATA= all_data;
cluster sdmvpsu;
strata sdmvstra;
weight wtsb16yr;
TABLES studypop*(age_cat riagendr ridreth1 edu_cat
                smoke_cat pir_5cat)*usyears_10/chisq col;
RUN;

*weighted percent of immigrants in each category;
PROC SURVEYFREQ DATA= all_data;
cluster sdmvpsu;

```

```
strata sdmvstra;
weight wtsb16yr;
TABLES studypop*usyears_10/chisq row;
RUN;
```

```
*****
```

TABLE 2: Percent detect and percentiles by immigrant status

```
*****;
```

```
proc univariate data=all_data plots normal;
var urxmep urxmbp urxmhp urxmzp urxmc1 urxmnm urxmnp urxmhh urxmoh urxmib;
run;
```

```
*log transform;
data all_data; set all_data;
/*MEP*/
ln_urxmep = log(urxmep);
/*MnBP*/
ln_urxmbp = log(urxmbp);
/*MEHP*/
ln_urxmhp = log(urxmhp);
/*MBZP*/
ln_urxmzp = log(urxmzp);
/*MCP*/
ln_urxmc1 = log(urxmc1);
/*MnMP*/
ln_urxmnm = log(urxmnm);
/*MiNP*/
ln_urxmnp = log(urxmnp);
/*MnOP*/
ln_urxmop = log(urxmop);
/*MHHP*/
ln_urxmhh = log(urxmhh);
/*MOH*/
ln_urxmoh = log(urxmoh);
/*MiBP*/
ln_urxmib = log(urxmib);
/*sumDEHP*/
ln_sumDEHP = log(sumDEHP);
run;
```

```
*Need to make <LOD flag;
```



```

proc univariate data=all_data;
var urxmbp urxmcp urxmep urxmhp urxmnp urxmop urxmzp
  urxmc1 urxmhh urxmoh urxmib urxmnm urxmnp urxmop;
where sddsrvyr =2;
run;
*1999-2000;
proc univariate data=all_data;
var urxmep urxmhp urxmop urxmzp
  urxmhh urxmoh urxmnp urxmop;
where sddsrvyr =1;
run;
proc univariate data=all_data;
var urxmc1 ;
where sddsrvyr =2;
run;
*making comment codes;
*MBP;
data all_data; set all_data;
if sddsrvyr = 1 and urxmbp = . then URDMBPLC = .;
else if sddsrvyr = 1 and urxmbp <=0.8 then URDMBPLC = 1;
else if sddsrvyr = 1 and urxmbp >0.8 then URDMBPLC = 0;
run;
data all_data; set all_data;
if sddsrvyr = 2 and urxmbp = . then URDMBPLC = .;
else if sddsrvyr = 2 and urxmbp <=0.8 then URDMBPLC = 1;
else if sddsrvyr = 2 and urxmbp >0.8 then URDMBPLC = 0;
run;
*MCP;
data all_data; set all_data;
if sddsrvyr = 2 and urxmcp = . then URDMCPLC = .;
else if sddsrvyr = 2 and urxmcp <=0.4264 then URDMCPLC = 1;
else if sddsrvyr = 2 and urxmcp >0.4264 then URDMCPLC = 0;
run;
*MEP;
data all_data; set all_data;
if sddsrvyr = 2 and urxmEp = . then URDMEPLC = .;
else if sddsrvyr = 2 and urxmEp <=0.42 then URDMEPLC = 1;
else if sddsrvyr = 2 and urxmEp >0.42 then URDMEPLC = 0;
run;
data all_data; set all_data;
if sddsrvyr = 1 and urxmEp = . then URDMEPLC = .;
else if sddsrvyr = 1 then URDMEPLC = 0;
run;
*MHP;
data all_data; set all_data;
if sddsrvyr = 2 and urxmhp = . then URDMhPLC = .;

```

```

else if sddsrstyr = 2 and urxmhp <=0.7 then URDMhPLC = 1;
else if sddsrstyr = 2 and urxmhp >0.7 then URDMhPLC = 0;
run;
data all_data; set all_data;
if sddsrstyr = 1 and urxmhp = . then URDMhPLC = .;
else if sddsrstyr = 1 and urxmhp <=0.8 then URDMhPLC = 1;
else if sddsrstyr = 1 and urxmhp >0.8 then URDMhPLC = 0;
run;
*MNP;
data all_data; set all_data;
if sddsrstyr = 2 and urxmnp = . then URDMnPLC = .;
else if sddsrstyr = 2 and urxmnp <=0.8712 then URDMnPLC = 1;
else if sddsrstyr = 2 and urxmnp >0.8712 then URDMnPLC = 0;
run;
*MOP;
data all_data; set all_data;
if sddsrstyr = 2 and urxmop = . then URDMoPLC = .;
else if sddsrstyr = 2 and urxmop <=1.1879 then URDMoPLC = 1;
else if sddsrstyr = 2 and urxmop >1.1879 then URDMoPLC = 0;
run;
*MZP;
data all_data; set all_data;
if sddsrstyr = 2 and urxmzp = . then URDMzPLC = .;
else if sddsrstyr = 2 and urxmzp <=0.1527 then URDMzPLC = 1;
else if sddsrstyr = 2 and urxmzp >0.1527 then URDMzPLC = 0;
run;
data all_data; set all_data;
if sddsrstyr = 1 and urxmzp = . then URDMzPLC = .;
else if sddsrstyr = 1 and urxmzp <=0.4073 then URDMzPLC = 1;
else if sddsrstyr = 1 and urxmzp >0.4073 then URDMzPLC = 0;
run;

*MNP;
data all_data; set all_data;
if sddsrstyr = 2 and urxmnp = . then URDMnpLC = .;
else if sddsrstyr = 2 and urxmnp <=0.8712 then URDMnpLC = 1;
else if sddsrstyr = 2 and urxmnp >0.8712 then URDMnpLC = 0;
run;
data all_data; set all_data;
if sddsrstyr = 1 and urxmnp = . then URDMnpLC = .;
else if sddsrstyr = 1 and urxmnp <=0.8712 then URDMnpLC = 1;
else if sddsrstyr = 1 and urxmnp >0.8712 then URDMnpLC = 0;
run;

*MoP;

```

```

data all_data; set all_data;
if sddsrvyr = 2 and urxmop = . then URDMopLC = .;
else if sddsrvyr = 2 and urxmop <=1.1879 then URDMopLC = 1;
else if sddsrvyr = 2 and urxmop >1.1879 then URDMopLC = 0;
run;

```

```

data all_data; set all_data;
if sddsrvyr = 1 and urxmop = . then URDMopLC = .;
else if sddsrvyr = 1 and urxmop <=1.0691 then URDMopLC = 1;
else if sddsrvyr = 1 and urxmop >1.0691 then URDMopLC = 0;
run;

```

\*MnM;

```

data all_data; set all_data;
if sddsrvyr = 2 and urxmnm = . then URDMNMLC = .;
else if sddsrvyr = 2 and urxmnm <=0.1 then URDMNMLC = 1;
else if sddsrvyr = 2 and urxmnm >0.1 then URDMNMLC = 0;
run;

```

\*MC1;

```

data all_data; set all_data;
if sddsrvyr = 2 and urxmc1 = . then URDmc1LC = .;
else if sddsrvyr = 2 and urxmc1 <=0.3 then URDmc1LC = 1;
else if sddsrvyr = 2 and urxmc1 >0.3 then URDmc1LC = 0;
run;

```

\*MHH;

```

data all_data; set all_data;
if sddsrvyr = 2 and urxmhh = . then URDMhhLC = .;
else if sddsrvyr = 2 and urxmhh <=0.7 then URDMhhLC = 1;
else if sddsrvyr = 2 and urxmhh >0.7 then URDMhhLC = 0;
run;

```

\*MOH;

```

data all_data; set all_data;
if sddsrvyr = 2 and urxmoh = . then URDMohLC = .;
else if sddsrvyr = 2 and urxmoh <=0.8 then URDMohLC = 1;
else if sddsrvyr = 2 and urxmoh >0.8 then URDMohLC = 0;
run;

```

\*MIB;

```

data all_data; set all_data;
if sddsrvyr = 2 and urxmib = . then URDMibLC = .;
else if sddsrvyr = 2 and urxmib <=0.7 then URDMibLC = 1;
else if sddsrvyr = 2 and urxmib >0.7 then URDMibLC = 0;
run;

```

\*2001-2002;

```

proc freq data=all_data;
tables urdmbplc URDMCPLC URDMEPLC URDMhPLC URDMnPLC URDMoPLC

```

```

URDMzPLC URDMNMLC URDmc1LC URDmhhLC URDmohLC URDmibLC URDMnpLC
URDMopLC;
where sddsrvyr =2 and studypop=1;
run;
proc freq data=all_data;
tables urdmbplc URDMCPLC URDMEPLC URDMhPLC URDMnPLC URDMoPLC
URDMzPLC URDMNMLC URDmc1LC URDmhhLC URDmohLC URDmibLC URDMnpLC
URDMopLC;
where sddsrvyr =1 and studypop=1;
run;

```

```

proc freq data=all_data;
tables urdmbplc URDMCPLC URDMEPLC URDMhPLC URDMnPLC URDMoPLC
URDMzPLC URDMNMLC URDmc1LC URDmhhLC URDmohLC URDmibLC URDMnpLC
URDMopLC;
by sddsrvyr;
where studypop=1;
run;

```

```

***** Table 2 values;
*****;
proc sort data=all_data;
by immigrant;
run;

```

```

proc univariate;
var urxmhp; /*0.35*/
where sddsrvyr = 6;
run;
proc print data=all_data;
var seqn sddsrvyr urdmhplc urxmhp;
where urdmhplc = 37;
run;

```

```

data all_data; set all_data;
if urdmhplc = 37 then urdmhplc = 1;
run;

```

```

*1999-2014 metabolites;
proc freq data = all_data;
tables (urdmeplc /*mep*/ URDMBPLC /*MnBP*/ urdmzplc /*MBzP*/) *immigrant;
where studypop=1;
run;
*2001-2014 metabolites;
proc freq data = all_data;

```

```

tables (urdmhplc /*MEHP*/
URDMIBLC /*MiBP*/ URDMC1LC /*MECPP*/
urdmhhlc /*MEHHP*/ urdmohlc /*MEOHP*/ )*immigrant;
where studypop=1;
run;

*percentiles;
proc sort data=all_data;
by immigrant;
run;
proc univariate data=all_data;
weight wtsb16yr;
var urxmep URXMBP urxmzp urxmib urxmc1 urxmhp urxmhh urxmoh sumDEHP;
by immigrant;
where studypop=1;
run;

*creatinine;
proc univariate data=all_data;
weight wtsb16yr;
var urxucr;
by immigrant;
where studypop=1;
run;

```

```

*****
TABLE 3: US BORN VS FOREIGN BORN (SHORT AND LONG TERM) PHTHALATE
LEVELS
*****

```

```

*Survey year dummies;
data all_data; set all_data;
if sddsrvyr ne . then do;
    year_1=(sddsrvyr=1);
    year_2=(sddsrvyr=2);
    year_3=(sddsrvyr=3);
    year_4=(sddsrvyr=4);
    year_5=(sddsrvyr=5);
    year_6=(sddsrvyr=6);
    year_7=(sddsrvyr=7);
    year_8=(sddsrvyr=8);
end;

```

```
run;
```

```
proc freq data=all_data;  
tables sddsrvyr year_1 year_2 year_3 year_4 year_5 year_6 year_7 year_8;  
where studypop=1;  
run;
```

```
*race;  
data all_data; set all_data;  
if ridreth1 ne . then do;  
    mexam= (ridreth1=1);  
    otherhis= (ridreth1=2);  
    white= (ridreth1=3);  
    black= (ridreth1=4);  
    other= (ridreth1=5);  
end;  
run;
```

```
proc freq data=all_data;  
tables ridreth1 mexam otherhis white black other;  
where studypop=1;  
run;
```

```
*education;  
data all_data; set all_data;  
if edu_cat ne . then do;  
    LT_HS= (edu_cat=1);  
    HS= (edu_cat=2);  
    SomeColl= (edu_cat=3);  
    Coll= (edu_cat=4);  
end;  
run;
```

```
proc freq data=all_data;  
tables edu_cat lt_hs hs somecoll coll;  
where studypop=1;  
run;
```

```
*PIR;  
data all_data; set all_data;  
if pir_cat ne . then do;  
    below_pov= (pir_cat=1);  
    above_pov= (pir_cat=2);  
end;  
run;
```

```

data all_data; set all_data;
if pir_5cat ne . then do;
    pir1= (pir_5cat=1);
    pir2= (pir_5cat=2);
    pir3= (pir_5cat=3);
    pir4= (pir_5cat=4);
    pir5= (pir_5cat=5);
end;
run;

```

```

*smoking;
data all_data; set all_data;
if current_smoker ne . then do;
    smoker= (current_smoker=1);
    nonsmoker= (current_smoker=0);
end;
run;

```

```

proc freq data=all_data;
tables pir_cat below_pov above_pov;
where studypop=1;
run;

```

\*MODELS by age and years in US: Table 3

\*\*\*\*\*;

\*making an interaction for age time years in US;

```

data all_data; set all_data;
if immigrant = . then resident_status = .;
else if ridageyr = . then resident_status = .;
else if immigrant = 1 and usyears_10 = . then resident_status = .;
else if immigrant = 0 and ridageyr <40 then resident_status = 0; /*Young US born*/
else if immigrant = 0 and ridageyr >=40 then resident_status = 1; /*Old US born*/
else if immigrant = 1 and usyears_10 = 1 and ridageyr <40 then resident_status = 2; /*Young
recent immigrant*/
else if immigrant = 1 and usyears_10 = 1 and ridageyr >=40 then resident_status = 3; /*Older
recent immigrant*/
else if immigrant = 1 and usyears_10 = 2 and ridageyr <40 then resident_status = 4; /*Young
long-term immigrant*/
else if immigrant = 1 and usyears_10 = 2 and ridageyr >=40 then resident_status = 5; /*Older
long-term immigrant*/
else resident_status = 6;
run;

```

```

proc freq data=all_data;
tables resident_status;

```

```

run;

*categorical;
data all_data; set all_data;
if resident_status ne . then do;
    US_Young= (resident_status=0);
    US_Old= (resident_status=1);
    Recent_Young= (resident_status=2);
    Recent_Old= (resident_status=3);
    Longer_Young= (resident_status=4);
    Longer_Old=(resident_status=5);
end;
run;

proc freq data=all_data;
tables resident_status us_young us_old recent_young recent_old longer_young longer_old;
where studypop=1;
run;

**MEP
*****;
*SAMPLE SIZES;
PROC SURVEYFREQ DATA= ALL_DATA;
cluster sdmvpsu;
strata sdmvstra;
weight WTSB16yr;
TABLES RESIDENT_STATUS;
WHERE URXMEN NE . AND URXUCR NE . AND EDU_CAT NE . AND RIDAGEYR NE .
AND RIAGENDR NE .
AND RIDRETH1 NE . AND PIR_5CAT NE . AND SDDSRVYR NE . AND STUDYPOP=1;
RUN;

*REF 1;
proc surveyreg data=all_data;
cluster sdmvpsu;
strata sdmvstra;
weight WTSB16yr;
model ln_urxmep = urxucr us_old recent_young recent_old longer_young longer_old
ridageyr ridageyr*ridageyr riagendr
hs somecoll coll
mexam otherhis other black
pir2 pir3 pir4 pir5
year_2 year_3 year_4 year_5 year_6 year_7 year_8/clparm;
domain studypop;
run;
*REF 2;

```



```

proc surveyreg data=all_data;
cluster sdmvpsu;
strata sdmvstra;
weight WTSB16yr;
model ln_urxmep = urxucr us_young recent_young recent_old longer_young longer_old
ridageyr ridageyr*ridageyr riagendr
hs somecoll coll
mexam otherhis other black
pir2 pir3 pir4 pir5
year_2 year_3 year_4 year_5 year_6 year_7 year_8/clparm;
domain studypop;
run;

```

\*\*MnBP

\*\*\*\*\*;

\*SAMPLE SIZES;

```
PROC SURVEYFREQ DATA= ALL_DATA;
```

```
cluster sdmvpsu;
```

```
strata sdmvstra;
```

```
weight WTSB16yr;
```

```
TABLES RESIDENT_STATUS;
```

```
WHERE URXMBP NE . AND URXUCR NE . AND EDU_CAT NE . AND RIDAGEYR NE .
AND RIAGENDR NE .
```

```
AND RIDRETH1 NE . AND PIR_CAT NE . AND current_smoker ne . and SDDSRVYR NE .
AND STUDYPOP=1;
```

```
RUN;
```

\*REF 1;

```
proc surveyreg data=all_data;
```

```
cluster sdmvpsu;
```

```
strata sdmvstra;
```

```
weight WTSB16yr;
```

```
model ln_urxmbp = urxucr us_old recent_young recent_old longer_young longer_old
```

```
ridageyr ridageyr*ridageyr riagendr
```

```
hs somecoll coll
```

```
mexam otherhis other black
```

```
pir2 pir3 pir4 pir5
```

```
smoker
```

```
year_2 year_3 year_4 year_5 year_6 year_7 year_8/clparm;
```

```
domain studypop;
```

```
run;
```

\*REF 2;

```
proc surveyreg data=all_data;
```

```
cluster sdmvpsu;
```

```
strata sdmvstra;
```

```
weight WTSB16yr;
```

```
model ln_urxmbp = urxucr us_young recent_young recent_old longer_young longer_old
```

```

ridageyr ridageyr*ridageyr riagendr
hs somecoll coll
mexam otherhis other black
pir2 pir3 pir4 pir5
smoker
year_2 year_3 year_4 year_5 year_6 year_7 year_8/clparm;
domain studypop;
run;

```

```
**MiBP
```

```
*****;
```

```
*SAMPLE SIZES;
```

```
PROC SURVEYFREQ DATA= ALL_DATA;
```

```
cluster sdmvpsu;
```

```
strata sdmvstra;
```

```
weight WTSB14yr;
```

```
TABLES RESIDENT_STATUS;
```

```
WHERE URXMIB NE . AND URXUCR NE . AND EDU_CAT NE . AND RIDAGEYR NE .
AND RIAGENDR NE .
```

```
AND RIDRETH1 NE . AND PIR_CAT NE . AND STUDYPOP=1 AND SDDSRVYR >=2;
```

```
RUN;
```

```
*REF 1;
```

```
proc surveyreg data=all_data;
```

```
cluster sdmvpsu;
```

```
strata sdmvstra;
```

```
weight WTSB14yr;
```

```
model ln_urxmib = urxucr us_old recent_young recent_old longer_young longer_old
```

```
ridageyr ridageyr*ridageyr riagendr
```

```
hs somecoll coll
```

```
mexam otherhis other black
```

```
pir2 pir3 pir4 pir5
```

```
year_2 year_3 year_4 year_5 year_6 year_7 year_8/clparm;
```

```
domain studypop;
```

```
where sddsrvyr >=2;
```

```
run;
```

```
*REF 2;
```

```
proc surveyreg data=all_data;
```

```
cluster sdmvpsu;
```

```
strata sdmvstra;
```

```
weight WTSB14yr;
```

```
model ln_urxmib = urxucr us_young recent_young recent_old longer_young longer_old
```

```
ridageyr ridageyr*ridageyr riagendr
```

```
hs somecoll coll
```

```
mexam otherhis other black
```

```
pir2 pir3 pir4 pir5
```

```

year_2 year_3 year_4 year_5 year_6 year_7 year_8/clparm;
domain studypop;
where sddsrvyr >=2;
run;

```

```

**MCP

```

```

*****;

```

```

*SAMPLE SIZES;

```

```

PROC SURVEYFREQ DATA= ALL_DATA;

```

```

cluster sdmvpsu;

```

```

strata sdmvstra;

```

```

weight WTSB14yr;

```

```

TABLES RESIDENT_STATUS;

```

```

WHERE URXMC1 NE . AND URXUCR NE . AND EDU_CAT NE . AND RIDAGEYR NE .
AND RIAGENDR NE .

```

```

AND RIDRETH1 NE . AND PIR_CAT NE . and current_smoker ne . AND STUDYPOP=1
AND SDDSRVYR >=2;

```

```

RUN;

```

```

*REF 1;

```

```

proc surveyreg data=all_data;

```

```

cluster sdmvpsu;

```

```

strata sdmvstra;

```

```

weight WTSB14yr;

```

```

model ln_urxmc1 = urxucr us_old recent_young recent_old longer_young longer_old

```

```

ridageyr ridageyr*ridageyr riagendr

```

```

hs somecoll coll

```

```

mexam otherhis other black

```

```

pir2 pir3 pir4 pir5

```

```

smoker

```

```

year_2 year_3 year_4 year_5 year_6 year_7 year_8/clparm;

```

```

domain studypop;

```

```

where sddsrvyr >=2;

```

```

run;

```

```

*REF 2;

```

```

proc surveyreg data=all_data;

```

```

cluster sdmvpsu;

```

```

strata sdmvstra;

```

```

weight WTSB14yr;

```

```

model ln_urxmc1 = urxucr us_young recent_young recent_old longer_young longer_old

```

```

ridageyr ridageyr*ridageyr riagendr

```

```

hs somecoll coll

```

```

mexam otherhis other black

```

```

pir2 pir3 pir4 pir5

```

```

smoker

```

```

year_2 year_3 year_4 year_5 year_6 year_7 year_8/clparm;

```

```

domain studypop;

```

```
where sddsrvyr >=2;
run;
```

```
**MBzP
```

```
*****;
```

```
*SAMPLE SIZES;
```

```
PROC SURVEYFREQ DATA= ALL_DATA;
```

```
cluster sdmvpsu;
```

```
strata sdmvstra;
```

```
weight WTSB16yr;
```

```
TABLES RESIDENT_STATUS;
```

```
WHERE URXMZP NE . AND URXUCR NE . AND EDU_CAT NE . AND RIDAGEYR NE .
AND RIAGENDR NE .
```

```
AND RIDRETH1 NE . AND PIR_CAT NE . AND SDDSRVYR NE . AND STUDYPOP=1;
```

```
RUN;
```

```
*REF 1;
```

```
proc surveyreg data=all_data;
```

```
cluster sdmvpsu;
```

```
strata sdmvstra;
```

```
weight WTSB16yr;
```

```
model ln_urxmzp = urxucr us_old recent_young recent_old longer_young longer_old
```

```
ridageyr ridageyr*ridageyr riagendr
```

```
hs somecoll coll
```

```
mexam otherhis other black
```

```
pir2 pir3 pir4 pir5
```

```
year_2 year_3 year_4 year_5 year_6 year_7 year_8/ clparm;
```

```
domain studypop;
```

```
run;
```

```
*REF 2;
```

```
proc surveyreg data=all_data;
```

```
cluster sdmvpsu;
```

```
strata sdmvstra;
```

```
weight WTSB16yr;
```

```
model ln_urxmzp = urxucr us_young recent_young recent_old longer_young longer_old
```

```
ridageyr ridageyr*ridageyr riagendr
```

```
hs somecoll coll
```

```
mexam otherhis other black
```

```
pir2 pir3 pir4 pir5
```

```
year_2 year_3 year_4 year_5 year_6 year_7 year_8/clparm;
```

```
domain studypop;
```

```
run;
```

```
**DEHP
```

```

*****;
*SAMPLE SIZE;
PROC SURVEYFREQ DATA= ALL_DATA;
cluster sdmvpsu;
strata sdmvstra;
weight WTSB14yr;
TABLES RESIDENT_STATUS;
WHERE LN_SUMDEHP NE . AND URXUCR NE . AND EDU_CAT NE . AND RIDAGEYR
NE . AND RIAGENDR NE .
AND RIDRETH1 NE . AND PIR_CAT NE . AND SDDSRVYR NE . AND SDDSRVYR >=2
AND STUDYPOP=1;
RUN;
proc surveyreg data=all_data;
cluster sdmvpsu;
strata sdmvstra;
weight WTSB14yr;
model ln_sumDEHP = urxucr us_old recent_young recent_old longer_young longer_old
ridageyr ridageyr*ridageyr riagendr
hs somecoll coll
mexam otherhis other black
pir2 pir3 pir4 pir5
year_2 year_3 year_4 year_5 year_6 year_7 year_8/clparm;
domain studypop;
where sddsrvyr >=2;
run;
proc surveyreg data=all_data;
cluster sdmvpsu;
strata sdmvstra;
weight WTSB14yr;
model ln_sumDEHP = urxucr us_young recent_young recent_old longer_young longer_old
ridageyr ridageyr*ridageyr riagendr
hs somecoll coll
mexam otherhis other black
pir2 pir3 pir4 pir5
year_2 year_3 year_4 year_5 year_6 year_7 year_8/clparm;
domain studypop;
where sddsrvyr >=2;
run;

```

\*\*\*\*\*

\* TABLE 4 \*

IN 2011-2014 ONLY, LSGMS BY RACE BETWEEN FOREIGN AND US

BORN

```
*****
```

```
;
```

```
**MEP
```

```
*****;
```

```
proc sort data=all_data;
```

```
by immigrant;
```

```
run;
```

```
*LSGMs: comparing immigrants to US born;
```

```
proc surveyreg data=all_data;
```

```
cluster sdmvpsu;
```

```
strata sdmvstra;
```

```
weight WTSB1114;
```

```
class riagendr edu_cat pir_cat sddsrivr immigrant;
```

```
model ln_urxmep = immigrant urxucr ridageyr ridageyr*ridageyr riagendr edu_cat pir_cat
```

```
sddsrivr/clparm;
```

```
lsmeans immigrant;
```

```
domain studypop*ridreth3;
```

```
run;
```

```
**MnBP
```

```
*****;
```

```
*LSGMs: comparing immigrants to US born;
```

```
proc surveyreg data=all_data;
```

```
cluster sdmvpsu;
```

```
strata sdmvstra;
```

```
weight WTSB1114;
```

```
class riagendr edu_cat pir_cat sddsrivr immigrant current_smoker;
```

```
model ln_urxmbp = immigrant urxucr ridageyr ridageyr*ridageyr riagendr edu_cat pir_cat
```

```
sddsrivr current_smoker/clparm;
```

```
lsmeans immigrant;
```

```
domain studypop*ridreth3;
```

```
run;
```

```
**MiBP
```

```
*****;
```

```
*LSGMs: comparing immigrants to US born;
```

```
proc surveyreg data=all_data;
```

```
cluster sdmvpsu;
```

```
strata sdmvstra;
```

```
weight WTSB1114;
```

```
class riagendr edu_cat pir_cat sddsrivr immigrant;
```

```
model ln_urxmib = immigrant urxucr ridageyr ridageyr*ridageyr riagendr edu_cat pir_cat
```

```
sddsrivr/clparm;
```

```
lsmeans immigrant;
```

```
domain studypop*ridreth3;
run;
```

```
**MCPP
```

```
*****;
```

```
*LSGMs: comparing immigrants to US born;
```

```
proc surveyreg data=all_data;
cluster sdmvpsu;
strata sdmvstra;
weight WTSB1114;
class riagendr edu_cat pir_cat sddsrvyr immigrant current_smoker;
model ln_urxmc1 = immigrant urxucr ridageyr ridageyr*ridageyr riagendr edu_cat pir_cat
sddsrvyr current_smoker/clparm;
lsmeans immigrant;
domain studypop*ridreth3;
run;
```

```
**MBzP
```

```
*****;
```

```
*LSGMs: comparing immigrants to US born;
```

```
proc surveyreg data=all_data;
cluster sdmvpsu;
strata sdmvstra;
weight WTSB1114;
class riagendr edu_cat pir_cat sddsrvyr immigrant;
model ln_urxmzp = immigrant urxucr ridageyr ridageyr*ridageyr riagendr edu_cat pir_cat
sddsrvyr/clparm;
lsmeans immigrant;
domain studypop*ridreth3;
run;
```

```
***DEHP
```

```
*****;
```

```
*LSGMs: comparing immigrants to US born;
```

```
proc surveyreg data=all_data;
cluster sdmvpsu;
strata sdmvstra;
weight WTSB1114;
class riagendr edu_cat pir_cat sddsrvyr immigrant;
model ln_sumDEHP = immigrant urxucr ridageyr ridageyr*ridageyr riagendr edu_cat pir_cat
sddsrvyr/clparm;
lsmeans immigrant;
domain studypop*ridreth3;
run;
```

```

*****
* FIGURE 1
*****
;
**MEP
*****;
*LSGMs: comparing immigrants to US born;
proc surveyreg data=all_data;
cluster sdmvpsu;
strata sdmvstra;
weight WTSB16yr;
class riagendr edu_cat ridreth1 pir_5cat sddsrstyr immigrant;
model ln_urxmep = immigrant urxucr ridageyr ridageyr*ridageyr riagendr edu_cat ridreth1
pir_5cat
sddsrstyr/clparm;
lsmeans immigrant;
domain studypop;
run;
*LSGMs: year_trends among immigrants
(code uses whole study population to predict LSmeans for this subset);
proc surveyreg data=all_data;
cluster sdmvpsu;
strata sdmvstra;
weight WTSB16yr;
class year_trends riagendr edu_cat ridreth1 pir_5cat sddsrstyr;
model ln_urxmep = urxucr year_trends ridageyr ridageyr*ridageyr riagendr edu_cat ridreth1
pir_5cat
sddsrstyr/clparm;
lsmeans year_trends;
domain studypop;
run;
*p-value for trend among immigrants only
(remove group 0 which is US born);
proc surveyreg data=all_data;
cluster sdmvpsu;
strata sdmvstra;
weight WTSB16yr;
class riagendr edu_cat ridreth1 pir_5cat sddsrstyr;
model ln_urxmep = urxucr year_trends ridageyr ridageyr*ridageyr riagendr edu_cat ridreth1
pir_5cat
sddsrstyr/clparm;
domain studypop*immigrant;
run;

```



```

**MnBP
*****;
*LSGMs: comparing immigrants to US born;
proc surveyreg data=all_data;
cluster sdmvpsu;
strata sdmvstra;
weight WTSB16yr;
class riagendr edu_cat ridreth1 pir_5cat sddsrstyr immigrant current_smoker;
model ln_urxmbp = immigrant urxucr ridageyr ridageyr*ridageyr riagendr edu_cat ridreth1
pir_5cat
current_smoker sddsrstyr/clparm;
lsmeans immigrant;
domain studypop;
run;
*LSGMs: year_trends among immigrants
(code uses whole study population to predict LSmeans for this subset);
proc surveyreg data=all_data;
cluster sdmvpsu;
strata sdmvstra;
weight WTSB16yr;
class year_trends riagendr edu_cat ridreth1 pir_5cat sddsrstyr current_smoker;
model ln_urxmbp = urxucr year_trends ridageyr ridageyr*ridageyr riagendr edu_cat ridreth1
pir_5cat
sddsrstyr current_smoker/clparm;
lsmeans year_trends;
domain studypop;
run;
*p-value for trend among immigrants only
(remove group 0 which is US born);
proc surveyreg data=all_data;
cluster sdmvpsu;
strata sdmvstra;
weight WTSB16yr;
class riagendr edu_cat ridreth1 pir_5cat sddsrstyr current_smoker;
model ln_urxmbp = urxucr year_trends ridageyr ridageyr*ridageyr riagendr edu_cat ridreth1
pir_5cat current_smoker
sddsrstyr/clparm;
domain studypop*immigrant;
run;

**MiBP
*****;
*LSGMs: comparing immigrants to US born;
proc surveyreg data=all_data;
cluster sdmvpsu;

```

```

strata sdmvstra;
weight WTSB14yr;
class riagendr edu_cat ridreth1 pir_5cat sddsrstyr immigrant;
model ln_urxmib = immigrant urxucr ridageyr ridageyr*ridageyr riagendr edu_cat ridreth1
pir_5cat
sddsrstyr/clparm;
lsmeans immigrant;
domain studypop;
where sddsrstyr >=2;
run;
*LSGMs: year_trends among immigrants
(code uses whole study population to predict LSmeans for this subset);
proc surveyreg data=all_data;
cluster sdmvpsu;
strata sdmvstra;
weight WTSB14yr;
class year_trends riagendr edu_cat ridreth1 pir_5cat sddsrstyr;
model ln_urxmib = urxucr year_trends ridageyr ridageyr*ridageyr riagendr edu_cat ridreth1
pir_5cat
sddsrstyr/clparm;
lsmeans year_trends;
domain studypop;
where sddsrstyr >=2;
run;
*p-value for trend among immigrants only
(remove group 0 which is US born);
proc surveyreg data=all_data;
cluster sdmvpsu;
strata sdmvstra;
weight WTSB14yr;
class riagendr edu_cat ridreth1 pir_5cat sddsrstyr;
model ln_urxmib = urxucr year_trends ridageyr ridageyr*ridageyr riagendr edu_cat ridreth1
pir_5cat
sddsrstyr/clparm;
domain studypop*immigrant;
where sddsrstyr >=2;
run;

**MCP
*****;
*LSGMs: comparing immigrants to US born;
proc surveyreg data=all_data;
cluster sdmvpsu;
strata sdmvstra;
weight WTSB14yr;

```

```

class riagendr edu_cat ridreth1 pir_5cat sddsrstyr immigrant current_smoker;
model ln_urxmc1 = immigrant urxucr ridageyr ridageyr*ridageyr riagendr edu_cat ridreth1
current_smoker pir_5cat
sddsrstyr/clparm;
lsmeans immigrant;
domain studypop;
where sddsrstyr >=2;
run;
*LSGMs: year_trends among immigrants
(code uses whole study population to predict LSmeans for this subset);
proc surveyreg data=all_data;
cluster sdmvpsu;
strata sdmvstra;
weight WTSB14yr;
class year_trends riagendr edu_cat ridreth1 pir_5cat current_smoker sddsrstyr;
model ln_urxmc1 = urxucr year_trends ridageyr ridageyr*ridageyr riagendr edu_cat ridreth1
pir_5cat current_smoker
sddsrstyr/clparm;
lsmeans year_trends;
domain studypop;
where sddsrstyr >=2;
run;
*p-value for trend among immigrants only
(remove group 0 which is US born);
proc surveyreg data=all_data;
cluster sdmvpsu;
strata sdmvstra;
weight WTSB14yr;
class riagendr edu_cat ridreth1 pir_5cat sddsrstyr current_smoker;
model ln_urxmc1 = urxucr year_trends ridageyr ridageyr*ridageyr riagendr edu_cat ridreth1
pir_5cat current_smoker
sddsrstyr/clparm;
domain studypop*immigrant;
where sddsrstyr >=2;
run;

**MBzP
*****.
*LSGMs: comparing immigrants to US born;
proc surveyreg data=all_data;
cluster sdmvpsu;
strata sdmvstra;
weight WTSB16yr;
class riagendr edu_cat ridreth1 pir_5cat sddsrstyr immigrant;

```

```

model ln_urxmzp = immigrant urxucr ridageyr ridageyr*ridageyr riagendr edu_cat ridreth1
pir_5cat
sddsrvyr/clparm;
lsmeans immigrant;
domain studypop;
run;
*LSGMs: year_trends among immigrants
(code uses whole study population to predict LSmeans for this subset);
proc surveyreg data=all_data;
cluster sdmvpsu;
strata sdmvstra;
weight WTSB16yr;
class year_trends riagendr edu_cat ridreth1 pir_5cat sddsrvyr;
model ln_urxmzp = urxucr year_trends ridageyr ridageyr*ridageyr riagendr edu_cat ridreth1
pir_5cat
sddsrvyr/clparm;
lsmeans year_trends;
domain studypop;
run;
*p-value for trend among immigrants only
(remove group 0 which is US born);
proc surveyreg data=all_data;
cluster sdmvpsu;
strata sdmvstra;
weight WTSB16yr;
class riagendr edu_cat ridreth1 pir_5cat sddsrvyr;
model ln_urxmzp = urxucr year_trends ridageyr ridageyr*ridageyr riagendr edu_cat ridreth1
pir_5cat
sddsrvyr/clparm;
domain studypop*immigrant;
run;

***DEHP
*****.
*LSGMs: comparing immigrants to US born;
proc surveyreg data=all_data;
cluster sdmvpsu;
strata sdmvstra;
weight WTSB14yr;
class riagendr edu_cat ridreth1 pir_5cat sddsrvyr immigrant;
model ln_sumDEHP = immigrant urxucr ridageyr ridageyr*ridageyr riagendr edu_cat ridreth1
pir_5cat
sddsrvyr/clparm;
lsmeans immigrant;
domain studypop;
where sddsrvyr >=2;

```

```

run;
*LSGMs: year_trends among immigrants
(code uses whole study population to predict LSmeans for this subset);
proc surveyreg data=all_data;
cluster sdmvpsu;
strata sdmvstra;
weight WTSB14yr;
class year_trends riagendr edu_cat ridreth1 pir_5cat sddsrvyr;
model ln_sumDEHP = urxucr year_trends ridageyr ridageyr*ridageyr riagendr edu_cat ridreth1
pir_5cat
sddsrvyr/clparm;
lsmeans year_trends;
domain studypop;
where sddsrvyr >=2;
run;
*p-value for trend among immigrants only
(remove group 0 which is US born);
proc surveyreg data=all_data;
cluster sdmvpsu;
strata sdmvstra;
weight WTSB14yr;
class riagendr edu_cat ridreth1 pir_5cat sddsrvyr;
model ln_sumDEHP = urxucr year_trends ridageyr ridageyr*ridageyr riagendr edu_cat ridreth1
pir_5cat
sddsrvyr/clparm;
domain studypop*immigrant;
where sddsrvyr >=2;
run;

```

```

*****
*
*****
*

```

SENSITIVITY ANALYSIS: SUPPLEMENTAL TABLE S4 IN MEXICAN AMERICANS ONLY

```

*****
*****
**MEP
*****;
*SAMPLE SIZES;
PROC SURVEYFREQ DATA= ALL_DATA;
cluster sdmvpsu;
strata sdmvstra;

```

```

weight WTSB16yr;
TABLES RESIDENT_STATUS;
WHERE URXMED NE . AND URXUCR NE . AND EDU_CAT NE . AND RIDAGEYR NE .
AND RIAGENDR NE .
AND RIDRETH1 = 1 AND PIR_CAT NE . AND SDDSRVYR NE . AND STUDYPOP=1;
RUN;

```

```

*REF 1;
proc surveyreg data=all_data;
cluster sdmvpsu;
strata sdmvstra;
weight WTSB16yr;
model ln_urxmep = urxucr us_old recent_young recent_old longer_young longer_old
ridageyr ridageyr*ridageyr riagendr
hs somecoll coll
PIR2 PIR3 PIR4 PIR5
year_2 year_3 year_4 year_5 year_6 year_7 year_8/clparm;
domain studypop*ridreth1;
run;

```

```

*REF 2;
proc surveyreg data=all_data;
cluster sdmvpsu;
strata sdmvstra;
weight WTSB16yr;
model ln_urxmep = urxucr us_young recent_young recent_old longer_young longer_old
ridageyr ridageyr*ridageyr riagendr
hs somecoll coll
PIR2 PIR3 PIR4 PIR5 year_2 year_3 year_4 year_5 year_6 year_7 year_8/clparm;
domain studypop*ridreth1;
run;

```

**\*\*MnBP**

\*\*\*\*\*;

\*SAMPLE SIZES;

```

PROC SURVEYFREQ DATA= ALL_DATA;
cluster sdmvpsu;
strata sdmvstra;
weight WTSB16yr;
TABLES RESIDENT_STATUS;
WHERE URXMBP NE . AND URXUCR NE . AND EDU_CAT NE . AND RIDAGEYR NE .
AND RIAGENDR NE .
AND RIDRETH1 =1 AND PIR_CAT NE . AND SDDSRVYR ne . and current_smoker ne .
AND STUDYPOP=1;
RUN;
*REF 1;

```

```

proc surveyreg data=all_data;
cluster sdmvpsu;
strata sdmvstra;
weight WTSB16yr;
model ln_urxmbp = urxucr us_old recent_young recent_old longer_young longer_old
ridageyr ridageyr*ridageyr riagendr
hs somecoll coll
nonsmoker
pir2 pir3 pir4 pir5
year_2 year_3 year_4 year_5 year_6 year_7 year_8/clparm;
domain studypop*ridreth1;
run;
*REF 2;
proc surveyreg data=all_data;
cluster sdmvpsu;
strata sdmvstra;
weight WTSB16yr;
model ln_urxmbp = urxucr us_young recent_young recent_old longer_young longer_old
ridageyr ridageyr*ridageyr riagendr
hs somecoll coll
nonsmoker
pir2 pir3 pir4 pir5
year_2 year_3 year_4 year_5 year_6 year_7 year_8/clparm;
domain studypop*ridreth1;
run;

```

\*\*MiBP

\*\*\*\*\*;

\*SAMPLE SIZES;

PROC SURVEYFREQ DATA= ALL\_DATA;

cluster sdmvpsu;

strata sdmvstra;

weight WTSB14yr;

TABLES RESIDENT\_STATUS;

WHERE URXMIB NE . AND URXUCR NE . AND EDU\_CAT NE . AND RIDAGEYR NE .  
AND RIAGENDR NE .

AND RIDRETH1 =1 AND PIR\_CAT NE . AND STUDYPOP=1 AND SDDSRVYR ne .;

RUN;

\*REF 1;

proc surveyreg data=all\_data;

cluster sdmvpsu;

strata sdmvstra;

weight WTSB14yr;

model ln\_urxmib = urxucr us\_old recent\_young recent\_old longer\_young longer\_old  
ridageyr ridageyr\*ridageyr riagendr

```

hs somecoll coll
pir2 pir3 pir4 pir5
year_3 year_4 year_5 year_6 year_7 year_8/clparm;
domain studypop*ridreth1;
run;
*REF 2;
proc surveyreg data=all_data;
cluster sdmvpsu;
strata sdmvstra;
weight WTSB14yr;
model ln_urxmib = urxucr us_young recent_young recent_old longer_young longer_old
ridageyr ridageyr*ridageyr riagendr
hs somecoll coll
pir2 pir3 pir4 pir5
year_3 year_4 year_5 year_6 year_7 year_8/clparm;
domain studypop*ridreth1;
run;

```

**\*\*MCP**

\*\*\*\*\*;

\*SAMPLE SIZES;

PROC SURVEYFREQ DATA= ALL\_DATA;

cluster sdmvpsu;

strata sdmvstra;

weight WTSB14yr;

TABLES RESIDENT\_STATUS;

WHERE URXMC1 NE . AND URXUCR NE . AND EDU\_CAT NE . AND RIDAGEYR NE .  
AND RIAGENDR NE .

AND RIDRETH1 =1 AND PIR\_CAT NE . and current\_smoker ne . AND STUDYPOP=1 AND  
SDDSRVYr ne .;

RUN;

\*REF 1;

proc surveyreg data=all\_data;

cluster sdmvpsu;

strata sdmvstra;

weight WTSB14yr;

model ln\_urxmc1 = urxucr us\_old recent\_young recent\_old longer\_young longer\_old

ridageyr ridageyr\*ridageyr riagendr

nonsmoker

hs somecoll coll

pir2 pir3 pir4 pir5

year\_3 year\_4 year\_5 year\_6 year\_7 year\_8/clparm;

domain studypop\*ridreth1;

run;

\*REF 2;

proc surveyreg data=all\_data;



```

cluster sdmvpsu;
strata sdmvstra;
weight WTSB14yr;
model ln_urxmc1 = urxucr us_young recent_young recent_old longer_young longer_old
ridageyr ridageyr*ridageyr riagendr
hs somecoll coll
nonsmoker
pir2 pir3 pir4 pir5
year_3 year_4 year_5 year_6 year_7 year_8/clparm;
domain studypop*ridreth1;
run;

```

\*\*MBzP

```
*****;
```

\*SAMPLE SIZES;

```
PROC SURVEYFREQ DATA= ALL_DATA;
```

```
cluster sdmvpsu;
```

```
strata sdmvstra;
```

```
weight WTSB16yr;
```

```
TABLES RESIDENT_STATUS;
```

```
WHERE URXMZP NE . AND URXUCR NE . AND EDU_CAT NE . AND RIDAGEYR NE .
AND RIAGENDR NE .
```

```
AND RIDRETH1 =1 AND PIR_CAT NE . AND SDDSRVYR ne . AND STUDYPOP=1;
```

```
RUN;
```

\*REF 1;

```
proc surveyreg data=all_data;
```

```
cluster sdmvpsu;
```

```
strata sdmvstra;
```

```
weight WTSB16yr;
```

```
model ln_urxmzp = urxucr us_old recent_young recent_old longer_young longer_old
```

```
ridageyr ridageyr*ridageyr riagendr
```

```
hs somecoll coll
```

```
pir2 pir3 pir4 pir5
```

```
year_2 year_3 year_4 year_5 year_6 year_7 year_8/clparm;
```

```
domain studypop*ridreth1;
```

```
run;
```

\*REF 2;

```
proc surveyreg data=all_data;
```

```
cluster sdmvpsu;
```

```
strata sdmvstra;
```

```
weight WTSB16yr;
```

```
model ln_urxmzp = urxucr us_young recent_young recent_old longer_young longer_old
```

```
ridageyr ridageyr*ridageyr riagendr
```

```
hs somecoll coll
```

```
pir2 pir3 pir4 pir5
```

```

year_2 year_3 year_4 year_5 year_6 year_7 year_8/clparm;
domain studypop*ridreth1;
run;

```

```

**DEHP

```

```

*****;

```

```

*SAMPLE SIZE;

```

```

PROC SURVEYFREQ DATA= ALL_DATA;

```

```

cluster sdmvpsu;

```

```

strata sdmvstra;

```

```

weight WTSB14yr;

```

```

TABLES RESIDENT_STATUS;

```

```

WHERE LN_SUMDEHP NE . AND URXUCR NE . AND EDU_CAT NE . AND RIDAGEYR
NE . AND RIAGENDR NE .

```

```

AND RIDRETH1 =1 AND PIR_CAT NE . AND SDDSRVYR NE . AND STUDYPOP=1;

```

```

RUN;

```

```

proc surveyreg data=all_data;

```

```

cluster sdmvpsu;

```

```

strata sdmvstra;

```

```

weight WTSB14yr;

```

```

model ln_sumDEHP = urxucr us_old recent_young recent_old longer_young longer_old

```

```

ridageyr ridageyr*ridageyr riagendr

```

```

hs somecoll coll

```

```

pir2 pir3 pir4 pir5

```

```

year_2 year_3 year_4 year_5 year_6 year_7 year_8/clparm;

```

```

domain studypop*ridreth1;

```

```

run;

```

```

proc surveyreg data=all_data;

```

```

cluster sdmvpsu;

```

```

strata sdmvstra;

```

```

weight WTSB14yr;

```

```

model ln_sumDEHP = urxucr us_young recent_young recent_old longer_young longer_old

```

```

ridageyr ridageyr*ridageyr riagendr

```

```

hs somecoll coll

```

```

pir2 pir3 pir4 pir5

```

```

year_2 year_3 year_4 year_5 year_6 year_7 year_8/clparm;

```

```

domain studypop*ridreth1;

```

```

run;

```

```

*****

```

\* PERCENT DIFFERENCE BY DEMOGRAPHICS:  
SUPPLEMENTAL TABLE S3

```
*****
```

```
;
```

```
**MEP
```

```
*****;
```

```
proc surveyreg data=all_data;
cluster sdmvpsu;
strata sdmvstra;
weight WTSB16yr;
class year_trends riagendr (ref='1') edu_cat (ref='1') ridreth1 (ref = '3') pir_5cat (ref = '1')
sddsrvyr;
model ln_urxmep = urxucr year_trends ridageyr ridageyr*ridageyr riagendr edu_cat ridreth1
pir_5cat
sddsrvyr/clparm solution;
domain studypop*immigrant;
run;
```

```
**MnbP
```

```
*****;
```

```
proc surveyreg data=all_data;
cluster sdmvpsu;
strata sdmvstra;
weight WTSB16yr;
class year_trends current_smoker (ref='1') riagendr (ref='1') edu_cat (ref='1') ridreth1 (ref = '3')
pir_5cat (ref = '1') sddsrvyr;
model ln_urxmbp = current_smoker urxucr year_trends ridageyr ridageyr*ridageyr riagendr
edu_cat ridreth1 pir_5cat
sddsrvyr/clparm solution;
domain studypop*immigrant;
run;
```

```
**MiBP
```

```
*****;
```

```
proc surveyreg data=all_data;
cluster sdmvpsu;
strata sdmvstra;
weight WTSB14yr;
class year_trends riagendr (ref='1') edu_cat (ref='1') ridreth1 (ref = '3') pir_5cat (ref = '1')
sddsrvyr;
model ln_urxmib = urxucr year_trends ridageyr ridageyr*ridageyr riagendr edu_cat ridreth1
pir_5cat
sddsrvyr/clparm solution;
domain studypop*immigrant;
run;
```

```
**MCP
```

```

*****;
proc surveyreg data=all_data;
cluster sdmvpsu;
strata sdmvstra;
weight WTSB14yr;
class year_trends current_smoker (ref='1') riagendr (ref='1') edu_cat (ref='1') ridreth1 (ref = '3')
pir_5cat (ref = '1') sddsrvyr;
model ln_urxmcl = urxucr current_smoker year_trends ridageyr ridageyr*ridageyr riagendr
edu_cat ridreth1 pir_5cat
sddsrvyr/clparm solution;
domain studypop*immigrant;
run;

```

\*\*MBzP

```

*****;
proc surveyreg data=all_data;
cluster sdmvpsu;
strata sdmvstra;
weight WTSB16yr;
class year_trends riagendr (ref='1') edu_cat (ref='1') ridreth1 (ref = '3') pir_5cat (ref = '1')
sddsrvyr;
model ln_urxmzp = urxucr year_trends ridageyr ridageyr*ridageyr riagendr edu_cat ridreth1
pir_5cat
sddsrvyr/clparm solution;
domain studypop*immigrant;
run;

```

\*\*DEHP

```

*****;
proc surveyreg data=all_data;
cluster sdmvpsu;
strata sdmvstra;
weight WTSB14yr;
class year_trends riagendr (ref='1') edu_cat (ref='1') ridreth1 (ref = '3') pir_5cat (ref = '1')
sddsrvyr;
model ln_sumdehp = urxucr year_trends ridageyr ridageyr*ridageyr riagendr edu_cat ridreth1
pir_5cat
sddsrvyr/clparm solution;
domain studypop*immigrant;
run;

```

```

*****
*
*****
*

```

SENSITIVITY ANALYSIS: SUPPLEMENTAL TABLE S5 2011-2014 ONLY

```
*****
*****
```

```
**MEP
```

```
*****;
```

```
*SAMPLE SIZES;
```

```
PROC SURVEYFREQ DATA= ALL_DATA;
```

```
cluster sdmvpsu;
```

```
strata sdmvstra;
```

```
weight WTSB1114;
```

```
TABLES RESIDENT_STATUS;
```

```
WHERE URXMEN . AND URXUCR NE . AND EDU_CAT NE . AND RIDAGEYR NE .  
AND RIAGENDR NE .
```

```
AND RIDRETH1 NE . AND PIR_CAT NE . AND SDDSRVYR NE . AND STUDYPOP=1;
```

```
RUN;
```

```
*REF 1;
```

```
proc surveyreg data=all_data;
```

```
cluster sdmvpsu;
```

```
strata sdmvstra;
```

```
weight WTSB1114;
```

```
model ln_urxmep = urxucr us_old recent_young recent_old longer_young longer_old
```

```
ridageyr ridageyr*ridageyr riagendr
```

```
hs somecoll coll
```

```
mexam otherhis other black
```

```
pir2 pir3 pir4 pir5
```

```
year_8/clparm;
```

```
domain studypop;
```

```
where sddsrvyr >=7;
```

```
run;
```

```
*REF 2;
```

```
proc surveyreg data=all_data;
```

```
cluster sdmvpsu;
```

```
strata sdmvstra;
```

```
weight WTSB1114;
```

```
model ln_urxmep = urxucr us_young recent_young recent_old longer_young longer_old
```

```
ridageyr ridageyr*ridageyr riagendr
```

```
hs somecoll coll
```

```
mexam otherhis other black
```

```
pir2 pir3 pir4 pir5
```

```
year_8/clparm;
```

```
domain studypop;
```

```
where sddsrvyr >=7;
```

```
run;
```

```

**MnBP
*****;
*SAMPLE SIZES;
PROC SURVEYFREQ DATA= ALL_DATA;
cluster sdmvpsu;
strata sdmvstra;
weight WTSB1114;
TABLES RESIDENT_STATUS;
WHERE URXMBP NE . AND URXUCR NE . AND EDU_CAT NE . AND RIDAGEYR NE .
AND RIAGENDR NE .
AND RIDRETH1 NE . AND PIR_CAT NE . and current_smoker ne . AND SDDSRVYR in
(7,8) AND STUDYPOP=1;
RUN;
*REF 1;
proc surveyreg data=all_data;
cluster sdmvpsu;
strata sdmvstra;
weight WTSB1114;
model ln_urxmbp = urxucr us_old recent_young recent_old longer_young longer_old
ridageyr ridageyr*ridageyr riagendr
hs somecoll coll
mexam otherhis other black
pir2 pir3 pir4 pir5
nonsmoker
year_8/clparm;
domain studypop;
where sddsrvyr >=7;
run;
*REF 2;
proc surveyreg data=all_data;
cluster sdmvpsu;
strata sdmvstra;
weight WTSB1114;
model ln_urxmbp = urxucr us_young recent_young recent_old longer_young longer_old
ridageyr ridageyr*ridageyr riagendr
hs somecoll coll
mexam otherhis other black
pir2 pir3 pir4 pir5
nonsmoker
year_8/clparm;
domain studypop;
where sddsrvyr >=7;
run;

**MiBP

```

```

*****;
*SAMPLE SIZES;
PROC SURVEYFREQ DATA= ALL_DATA;
cluster sdmvpsu;
strata sdmvstra;
weight WTSB1114;
TABLES RESIDENT_STATUS;
WHERE URXMIB NE . AND URXUCR NE . AND EDU_CAT NE . AND RIDAGEYR NE .
AND RIAGENDR NE .
AND RIDRETH1 NE . AND PIR_CAT NE . AND STUDYPOP=1 AND SDDSRVYR >=7;
RUN;
*REF 1;
proc surveyreg data=all_data;
cluster sdmvpsu;
strata sdmvstra;
weight WTSB1114;
model ln_urxmib = urxucr us_old recent_young recent_old longer_young longer_old
ridageyr ridageyr*ridageyr riagendr
hs somecoll coll
mexam otherhis other black
pir2 pir3 pir4 pir5
year_8/clparm;
domain studypop;
where sddsrvyr >=7;
run;
*REF 2;
proc surveyreg data=all_data;
cluster sdmvpsu;
strata sdmvstra;
weight WTSB1114;
model ln_urxmib = urxucr us_young recent_young recent_old longer_young longer_old
ridageyr ridageyr*ridageyr riagendr
hs somecoll coll
mexam otherhis other black
pir2 pir3 pir4 pir5
year_8/clparm;
domain studypop;
where sddsrvyr >=7;
run;

**MCP
*****;
*SAMPLE SIZES;
PROC SURVEYFREQ DATA= ALL_DATA;
cluster sdmvpsu;
strata sdmvstra;

```

```

weight WTSB1114;
TABLES RESIDENT_STATUS;
WHERE URXMC1 NE . AND URXUCR NE . AND EDU_CAT NE . AND RIDAGEYR NE .
AND RIAGENDR NE .
AND RIDRETH1 NE . AND PIR_CAT NE . and current_smoker ne . AND STUDYPOP=1
AND SDDSRVYR >=7;
RUN;
*REF 1;
proc surveyreg data=all_data;
cluster sdmvpsu;
strata sdmvstra;
weight WTSB1114;
model ln_urxmc1 = urxucr us_old recent_young recent_old longer_young longer_old
ridageyr ridageyr*ridageyr riagendr
hs somecoll coll
mexam otherhis other black
pir2 pir3 pir4 pir5
nonsmoker
year_8/clparm;
domain studypop;
where sddsrvyr >=7;
run;
*REF 2;
proc surveyreg data=all_data;
cluster sdmvpsu;
strata sdmvstra;
weight WTSB1114;
model ln_urxmc1 = urxucr us_young recent_young recent_old longer_young longer_old
ridageyr ridageyr*ridageyr riagendr
hs somecoll coll
mexam otherhis other black
pir2 pir3 pir4 pir5
nonsmoker
year_8/clparm;
domain studypop;
where sddsrvyr >=7;
run;

**MBzP
*****.
*SAMPLE SIZES;
PROC SURVEYFREQ DATA= ALL_DATA;
cluster sdmvpsu;
strata sdmvstra;
weight WTSB1114;
TABLES RESIDENT_STATUS;

```



```

WHERE URXMZP NE . AND URXUCR NE . AND EDU_CAT NE . AND RIDAGEYR NE .
AND RIAGENDR NE .
AND RIDRETH1 NE . AND PIR_CAT NE . AND SDDSRVYR >=7 AND STUDYPOP=1;
RUN;

```

```

*REF 1;
proc surveyreg data=all_data;
cluster sdmvpsu;
strata sdmvstra;
weight WTSB1114;
model ln_urxmzp = urxucr us_old recent_young recent_old longer_young longer_old
ridageyr ridageyr*ridageyr riagendr
hs somecoll coll
mexam otherhis other black
pir2 pir3 pir4 pir5
year_8/ clparm;
domain studypop;
where sddsrvyr >=7;
run;

```

```

*REF 2;
proc surveyreg data=all_data;
cluster sdmvpsu;
strata sdmvstra;
weight WTSB1114;
model ln_urxmzp = urxucr us_young recent_young recent_old longer_young longer_old
ridageyr ridageyr*ridageyr riagendr
hs somecoll coll
mexam otherhis other black
pir2 pir3 pir4 pir5 year_8/clparm;
domain studypop;
where sddsrvyr >=7;
run;

```

**\*\*DEHP**

\*\*\*\*\*;

**\*SAMPLE SIZE;**

**PROC SURVEYFREQ DATA= ALL\_DATA;**

**cluster sdmvpsu;**

**strata sdmvstra;**

**weight WTSB1114;**

**TABLES RESIDENT\_STATUS;**

**WHERE LN\_SUMDEHP NE . AND URXUCR NE . AND EDU\_CAT NE . AND RIDAGEYR  
NE . AND RIAGENDR NE .**

**AND RIDRETH1 NE . AND PIR\_CAT NE . AND SDDSRVYR NE . AND SDDSRVYR >=7  
AND STUDYPOP=1;**

```
RUN;
proc surveyreg data=all_data;
cluster sdmvpsu;
strata sdmvstra;
weight WTSB1114;
model ln_sumDEHP = urxucr us_old recent_young recent_old longer_young longer_old
ridageyr ridageyr*ridageyr riagendr
hs somecoll coll
mexam otherhis other black
pir2 pir3 pir4 pir5
year_8/clparm;
domain studypop;
where sddsrvyr >=7;
run;
proc surveyreg data=all_data;
cluster sdmvpsu;
strata sdmvstra;
weight WTSB1114;
model ln_sumDEHP = urxucr us_young recent_young recent_old longer_young longer_old
ridageyr ridageyr*ridageyr riagendr
hs somecoll coll
mexam otherhis other black
pir2 pir3 pir4 pir5
year_8/clparm;
domain studypop;
where sddsrvyr >=7;
run;
```
